# Supplementary material for: Nitrogen-Doped Titanium Dioxide Mixed with Calcium Peroxide and Methylcellulose for Dental Bleaching under Visible Light Activation
Source: MDPI journal article supplement (doi:10.3390/ijms22073759), 2021-04-04
Supplement: s1 [file s1]

## Supplementary File

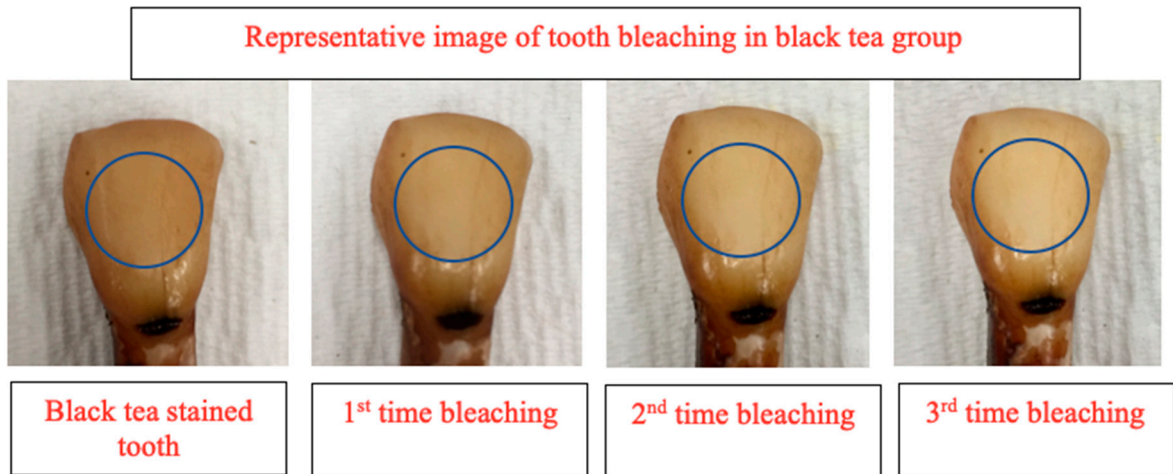

Supplementary figure 1. Representative image of tooth bleaching in black tea stained group

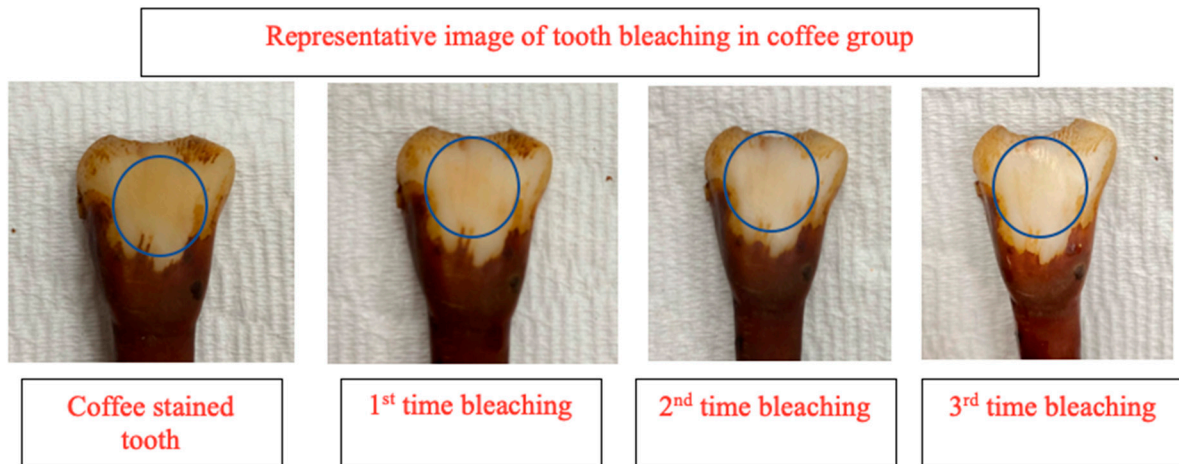

Supplementary figure 2. Representative image of tooth bleaching in coffee stained group
